# Supplementary material for: Seasonality in Adverse Drug Events: Time-Series Analysis of JADER Using ARIMA/SARIMA and Prophet
Source: Research Square preprint supplement (doi:10.21203/rs.3.rs-6746128/v1), 2025-10-26
Supplement: Supplementary file 1 [file 59b22d0529d6af29d6860b7f.xlsx]

## Sheet: Supplementary Table S3b
Supplementary Table S3b (continued) Top ten suspected drugs reported for each adverse event.
Adverse events	Rported suspect drug	Counts
Influenza	Prednisolone	47
	Tacrolimus	35
	Methotrexate	25
	Lenalidomide	24
	Dexamethasone	22
	Tocilizumab	17
	Tofacitinib	15
	Etanercept	13
	Rituximab	12
	Ixazomib	11
Intestinal ischaemia	Docetaxel	10
	Fluorouracil	9
	Noradrenaline	8
	Cisplatin	7
	Tegafur, gimeracil and oteracil potassium	5
	Bevacizumab	5
	Sorafenib	4
	Dopamine	3
	Vasopressin	3
	Prednisolone	3
Lacunar infarction	Ipragliflozin	21
	Luseogliflozin	14
	Aflibercept	11
	Tofogliflozin	10
	Empagliflozin	8
	Dapagliflozin	7
	Dabigatran	7
	Bevacizumab	6
	Ranibizumab	6
	Etanercept	5
Malaise	Pregabalin	7
	Teriparatide	6
	Pembrolizumab	6
	Valacyclovir	5
	Prednisolone	5
	Lamotrigine	5
	Risedronate	5
	Lenalidomide	4
	Peritoneal dialysis solution	4
	Etanercept	3
Paronychia	Lapatinib	79
	Capecitabine	69
	Erlotinib	55
	Cetuximab	31
	Panitumumab	19
	Bevacizumab	15
	Gefitinib	14
	Afatinib	11
	Irinotecan	11
	Ramucirumab	11
Secondary adrenal insufficiency	Nivolumab	147
	Ipilimumab	75
	Pembrolizumab	27
	Prednisolone	5
	Clobetasol Propionate	4
	Ciclesonide	2
	Sunitinib	2
	Dabrafenib	2
	Dexamethasone	2
	Trametinib	2
Transfusion-associated circulatory overload	Human red blood cell solution	214
	Human platelet concentrate	58
	Fresh frozen human plasma	46
	Fluorouracil	1
	Caspofungin	1
	Cyclosporine	1
	Cytarabine	1
	Cefmetazole	1
	Doxorubicin	1
	Tretinoin	1
Type 1 diabetes mellitus	Nivolumab	166
	Pembrolizumab	78
	Ribavirin	71
	Peginterferon alfa-2b	64
	Ipilimumab	32
	Peginterferon alfa-2a	20
	Prednisolone	13
	Interferon alfa	6
	Carbamazepine	6
	Mexiletine	6
	Interferon alfa-2b	5
