# Supplementary material for: Seasonality in Adverse Drug Events: Time-Series Analysis of JADER Using ARIMA/SARIMA and Prophet
Source: Research Square preprint supplement (doi:10.21203/rs.3.rs-6746128/v1), 2025-10-26
Supplement: Supplementary file 2 [file 744cc8e760df33ad300143e3.xlsx]

## Sheet: Table 1
Table 1 Comparison of monthly seasonal values derived from Prophet analysis and maximum/minimum aggregate counts in reported adverse events.
	Prophet seasonal value†			Aggregated reports‡
Aadverse event	Highest month	Lowest month		Maximum month	Minimum month
Acute disseminated encephalomyelitis	11	6		11	9
Appetite loss	6	2		7	12
Aspiration	8	4		9	2
Atypical femur fracture	4	8		10	8
Encephalitis	4	2		11	3
Guillain-Barre syndrome	12	10		11	7
Hypophysitis	3	7		6	9
Immune-mediated enterocolitis	3	8		12	3
Influenza	1	7		1	6
Intestinal ischemia	2	12		2	1
Lacunar infarction	6	3		6	3
Malaise	3	1		7	1, 2, 6, 11
Paronychia	10	3		10	3, 12
Secondary adrenal insufficiency	9	12		7	3
Transfusion-associated circulatory overload	11	10		2	1
Type 1 diabetes mellitus	9	10		10	2
† This value represents the seasonal component calculated by the Prophet model, highlighting the months with the highest and lowest seasonal effects.
‡ Monthly aggregation of report counts identified maximum and minimum reporting months across the 15-year period (2005–2019).
