# Supplementary material for: Seasonality in Adverse Drug Events: Time-Series Analysis of JADER Using ARIMA/SARIMA and Prophet
Source: Research Square preprint supplement (doi:10.21203/rs.3.rs-6746128/v1), 2025-10-26
Supplement: Supplementary file 4 [file 79408997c945c3549346d4c3.xlsx]

## Sheet: Supplementary Table S3a
Supplementary Table S3a Top ten suspected drugs reported for each adverse event.
Adverse events	Rported suspect drug	Counts
Acute disseminated encephalomyelitis	Influenza HA vaccine	133
	Freeze-dried cell culture-derived Japanese encephalitis vaccine	40
	Freeze-dried live attenuated measles-rubella combined vaccine	20
	Freeze-dried live attenuated mumps vaccine	9
	Freeze-dried live attenuated measles-rubella combined vaccine	6
	Recombinant adsorbed quadrivalent human papillomavirus virus-like particle vaccine	5
	Abacavir	4
	Sanilvudine	4
	Adsorbed diphtheria-purified pertussis-tetanus-inactivated polio combined vaccine	4
	Pneumococcal polysaccharide conjugate vaccine	4
Appetite loss	Tegafur, gimeracil and oteracil potassium	653
	Ribavirin	421
	Cisplatin	406
	Oxaliplatin	364
	Peginterferon alfa-2b	351
	Irinotecan	316
	Fluorouracil	314
	Telaprevir	299
	Bevacizumab	213
	Levo-folinate	199
Aspiration	Live attenuated human rota virus vaccin	11
	Risperidone	10
	Clozapine	8
	Cetuximab	8
	Lanthanum carbonate	8
	Clonazepam	7
	Haemophilus b conjugate vaccine	7
	Pneumococcal 13-valent conjugate vaccine	7
	Trazodone	6
	Valproic acid	6
Atypical femur fracture	Alendronate	181
	Denosumab	116
	Zoledronic acid	65
	Minodronic acid	42
	Risedronic acid	38
	Prednisolone	26
	Ibandronic acid	11
	Lansoprazole	10
	Etidronic acid	4
	Pamidronic acid	4
Encephalitis	Nivolumab	32
	Freeze-dried live attenuated mumps vaccine	30
	Influenza HA vaccine	29
	Pembrolizumab	27
	Atezolizumab	23
	Freeze-dried live attenuated measles-rubella combined vaccine	10
	Freeze-dried cell culture-derived Japanese encephalitis vaccine	10
	Prednisolone	9
	Methotrexate	8
	Ipilimumab	7
Guillain-Barre syndrome	Influenza HA vaccine	132
	Pneumococcal vaccinatio	31
	Recombinant adsorbed quadrivalent human papillomavirus virus-like particle vaccine	15
	Pembrolizumab	9
	Freeze-dried cell culture-derived Japanese encephalitis vaccine	8
	Recombinant adsorbed quadrivalent human papillomavirus virus-like particle vaccine	7
	Ribavirin	6
	Recombinant adsorbed Hepatitis B Vaccine	6
	Infliximab	5
	Pneumococcal 13-valent conjugate vaccine	0
Hypophysitis	Nivolumab	118
	Ipilimumab	112
	Pembrolizumab	29
	Dabrafenib	3
	Trametinib	3
	Infliximab	2
	Cisplatin	2
	Sulfamethoxazole/trimethoprim	2
	Hydrocortisone Succinate	2
	Atezolizumab	1
Immune-mediated enterocolitis	Nivolumab	106
	Pembrolizumab	81
	Ipilimumab	51
	Carboplatin	10
	Pemetrexed	6
	Paclitaxel (albumin-bound)	6
	Atezolizumab	5
	Prednisolone	5
	Sulfamethoxazole/trimethoprim	4
	Paclitaxel	2
