# Supplementary material for: Seasonality in Adverse Drug Events: Time-Series Analysis of JADER Using ARIMA/SARIMA and Prophet
Source: Research Square preprint supplement (doi:10.21203/rs.3.rs-6746128/v1), 2025-10-26
Supplement: Supplementary file 5 [file bfaeb7180264ca463d9f58c6.xlsx]

## Sheet: Supplymentary Table S1
Supplementary Table S1 Comparative evaluation of MAE, RMSE, and MAPE between seasonal and non-seasonal Prophet models.
				MAE				RMSE				MAPE
Adverse events	Preferred term	Counts (n)	seasonal	non-seasonal	Δ MAE†		seasonal	non-seasonal	Δ RMSE†		seasonal	non-seasonal	Δ MAPE†
Abdominal pain upper	10000087	347	1.42596	1.43607	0.0101064		1.75371	1.75541	0.00170322		-‡	-‡	-‡
Acute disseminated encephalomyelitis	10000709	243	1.19418	1.44274	0.248556		1.49076	1.70672	0.215969		-	-	-
Adrenal insufficiency	-	848	2.71958	2.74639	0.0268128		4.1677	4.21929	0.0515924		-	-	-
Anaphylactic shock	10002199	12364	8.03713	8.53772	0.500591		9.95296	9.99369	0.040736		0.122825	0.131978	0.00915247
Anemia	10002034	9560	32.3452	34.229	1.88381		46.7728	48.5559	1.78302		0.646599	0.68438	0.0377809
Appetite loss	-	5790	11.3184	11.9822	0.663864		14.4352	14.8722	0.437		0.38559	0.412903	0.0273131
Aspiration	-	135	0.835373	0.862103	0.02673		1.07641	1.09267	0.0162623		-	-	-
Atypical femur fracture	10070884	389	1.73711	1.74564	0.00852523		2.23869	2.24647	0.00778109		-	-	-
Blood creatinine increased	10005483	1329	4.24866	4.28213	0.0334693		5.52134	5.66942	0.148074		0.790267	0.87615	0.0858821
Blood uric acid increased	10005861	181	1.46555	1.48571	0.020151		1.94672	1.96528	0.0185602		-	-	-
Bone pain	10006002	100	0.652885	0.656236	0.00335103		0.768432	0.745752	-0.0226801		-	-	-
Bronchopulmonary aspergillosis	10006473	398	1.42893	1.45659	0.0276649		1.7911	1.74659	-0.0445078		-	-	-
Cognitive disorder	10057668	150	0.844937	0.846312	0.00137573		1.06974	1.03377	-0.0359634		-	-	-
Completed suicide	10010144	628	1.98562	1.9888	0.00318774		2.39106	2.32411	-0.0669524		-	-	-
Complications at arteriovenous fistula site	-	388	3.04976	3.05046	0.0007058		5.07761	5.07188	-0.0057268		-	-	-
Corneal disorder	10061453	101	0.663444	0.672536	0.0090924		0.854912	0.821576	-0.033336		-	-	-
Cytomegalovirus viremia	10058854	369	1.72886	1.76997	0.0411177		2.24653	2.18788	-0.0586545		-	-	-
death	-	2541	3.99883	4.18793	0.189101		5.11594	5.25874	0.1428		0.270283	0.276598	0.0063147
Dehydration	10012174	1707	4.29418	4.36624	0.0720664		5.5823	5.71865	0.136343		0.461678	0.458453	-0.00322556
Dizziness	10013573	2253	5.60188	5.7096	0.107719		7.10264	7.13926	0.0366118		0.451322	0.460706	0.0093836
Dyskinesia	10013916	512	1.79593	1.81364	0.0177131		2.26145	2.19918	-0.0622732		-	-	-
Encephalitis	10014581	264	1.23588	1.24927	0.0133933		1.6244	1.62698	0.00258656		-	-	-
Encephalopathy	10014625	807	2.24975	2.26405	0.0143041		2.87422	2.81884	-0.0553784		-	-	-
Epistaxis	10015090	572	1.76911	1.96155	0.192433		2.13727	2.39531	0.258039		-	-	-
Erythema multiforme	10015218	3845	7.54414	7.75635	0.212219		9.07205	9.30109	0.229038		0.372786	0.391449	0.0186631
Fatigue	-	3207	6.54249	6.80012	0.257636		8.24522	8.51788	0.272662		0.45614	0.472676	0.0165359
Fulminant type 1 diabetes mellitus	10072628	230	0.90528	0.931094	0.0258135		1.58799	1.6265	0.0385133		-	-	-
Gastrointestinal perforation	10018001	829	2.36998	2.37983	0.00984503		2.90704	2.82473	-0.0823099		0.663847	0.654517	-0.0093297
Guillain-Barre syndrome	10018767	288	1.19333	1.52807	0.334734		1.49529	1.81171	0.316412		-	-	-
Hemorrhage subcutaneous	10018999	1178	3.73675	3.8644	0.127648		4.78589	4.91954	0.133652		-	-	-
Henoch-Schonlein purpura	10019617	227	1.23009	1.24884	0.0187509		1.53004	1.50316	-0.0268809		-	-	-
Hepatic cirrhosis	10019641	174	0.918574	0.950295	0.0317202		1.16962	1.17987	0.0102465		-	-	-
Herpes zoster	10019974	1681	3.56651	3.58521	0.0186982		4.45628	4.36278	-0.0935063		0.463744	0.461011	-0.00273353
Hydronephrosis	10020524	143	0.842888	0.850227	0.00733821		1.05682	1.0702	0.0133826		-	-	-
Hyperuricemia	10020903	430	4.41701	4.45759	0.040581		6.90762	7.02837	0.120755		-	-	-
Hyponatremia	10021036	2339	3.87833	4.8818	1.00346		4.76004	5.82783	1.0678		0.355125	0.448083	0.0929578
Hypophysitis	-	164	0.715851	0.731687	0.015836		1.43566	1.45489	0.019226		-	-	-
Hypothermia	10021113	283	1.18007	1.34047	0.160401		1.58056	1.69629	0.115726		-	-	-
Hypothyroidism	10021114	1002	3.67133	3.67881	0.00747404		4.88021	4.94439	0.064172		-	-	-
Immune-mediated enterocolitis	10078961	192	0.889072	0.895492	0.0064202		1.97319	1.97861	0.00541748		-	-	-
Inappropriate antidiuretic hormone secretion	10053198	1015	2.38015	2.4414	0.0612438		2.88769	2.94324	0.0555486		-	-	-
Influenza	10022000	307	1.86576	2.4037	0.537941		2.30763	2.96702	0.659389		-	-	-
Inhibition of factor VIII	-	251	1.27948	1.33673	0.0572496		1.55675	1.55182	-0.00492697		-	-	-
Injection site erythema	10022061	446	1.67513	1.78393	0.108794		2.08305	2.21288	0.129835		-	-	-
Injection site fever	-	102	0.725741	0.731846	0.00610514		0.966422	0.952647	-0.0137745		-	-	-
Injection site swelling	10053425	534	2.08231	2.42689	0.344575		2.63885	3.06445	0.425606		-	-	-
Intestinal ischemia	10022680	112	0.745178	0.745642	0.000464234		0.929775	0.917596	-0.0121791		-	-	-
Lactic acidosis	10023676	486	1.64506	1.64739	0.00233721		2.14495	2.16202	0.0170762		-	-	-
Lacunar infarction	10051078	238	1.12618	1.16425	0.0380641		1.35545	1.36222	0.0067685		-	-	-
Liver function test abnormal	10024690	440	1.75678	1.78752	0.0307326		2.0772	2.0678	-0.00940026		-	-	-
Loss of consciousness	10024855	3625	8.61388	8.75823	0.144351		11.4476	11.592	0.144376		0.403876	0.420317	0.0164414
Malaise	-	170	0.769323	0.787365	0.018042		1.0271	1.04823	0.0211292		-	-	-
Mental disorder	10061284	101	0.680014	0.687054	0.00703943		0.863551	0.834957	-0.0285938		-	-	-
Nausea	10028813	4421	7.33319	7.58264	0.249446		9.14251	9.28275	0.140242		0.329228	0.341968	0.0127399
Nephrogenic diabetes insipidus	10029147	116	0.709057	0.735131	0.0260741		0.882459	0.871337	-0.0111221		-	-	-
Nephrotic syndrome	10029164	843	2.06493	2.13928	0.0743479		2.50097	2.56594	0.0649617		-	-	-
Pancytopenia	10033661	3891	5.01839	5.05373	0.035341		6.06031	6.01626	-0.0440502		0.256161	0.259913	0.00375164
Paronychia	-	242	1.58169	1.64137	0.0596762		2.18252	2.2055	0.0229796		-	-	-
Peripheral arterial occlusive disease	10062585	122	0.730194	0.734604	0.00440993		0.898808	0.878053	-0.0207555		-	-	-
Photosensitivity reaction	10034972	298	1.60722	1.71333	0.106108		2.0203	2.04656	0.0262595		-	-	-
Pneumocystis jirovecii pneumonia	10073755	1949	3.1109	3.23841	0.127513		3.94416	4.00526	0.061102		0.353483	0.371124	0.017641
Pneumonia pneumococcal	10035728	240	1.21282	1.21375	0.000935902		1.45329	1.46833	0.0150338		-	-	-
Pneumonitis	10035742	1162	3.62433	3.62865	0.00431861		5.48199	5.44663	-0.0353588		-	-	-
Post transplant lymphoproliferative disorder	10051358	169	1.10898	1.12578	0.0167982		1.36111	1.28175	-0.0793566		-	-	-
Pyrexia	10037660	11283	11.6889	12.0193	0.330385		14.7595	15.3682	0.60868		0.176757	0.186874	0.0101168
Renal disorder	10038428	1701	4.55946	4.71156	0.152107		5.85006	5.99915	0.149094		0.606784	0.652301	0.0455164
Renal impairment	10062237	5844	8.7089	8.73013	0.0212312		11.7776	11.9278	0.150124		0.254351	0.255547	0.00119675
Secondary adrenal insufficiency	-	197	0.983257	1.00527	0.0220138		1.81355	1.83763	0.0240732		-	-	-
Tinnitus	10043882	102	0.733154	0.738196	0.00504286		0.877256	0.850085	-0.0271707		-	-	-
Transfusion-associated circulatory overload	-	255	1.03104	1.05703	0.0259832		1.53323	1.56048	0.0272493		-	-	-
Type 1 diabetes mellitus	10067584	409	1.75344	1.81033	0.0568895		2.70843	2.76642	0.0579935		-	-	-
Ulcerative keratitis	10064996	102	0.654084	0.672564	0.0184798		0.769903	0.763575	-0.00632741		-	-	-
Uterine cancer	10046766	121	0.69303	0.697569	0.00453832		0.856053	0.820988	-0.035065		-	-	-
Vision blurred	10047513	229	1.09701	1.11001	0.0130061		1.35069	1.33586	-0.0148267		-	-	-
Visual field defect	10047555	137	0.805265	0.850432	0.045167		1.06068	1.08189	0.0212015		-	-	-
† The error parameter value of the no-seasonal model was deducted from that of the seasonal model.
‡ Due to the absence of reported cases in certain months, the calculation of MAPE was not feasible.
