# Supplementary material for: Seasonality in Adverse Drug Events: Time-Series Analysis of JADER Using ARIMA/SARIMA and Prophet
Source: Research Square preprint supplement (doi:10.21203/rs.3.rs-6746128/v1), 2025-10-26
Supplement: Supplementary file 6 [file dd1159cdab7c9bc735cd31d3.xlsx]

## Sheet: Supplymentary Table S2
Supplementary Table S2 Comparative evaluation of the MAE, RMSE, and MAPE between SARIMA and ARIMA models.
				MAE				RMSE				MAPE
Adverse events	Priferred term	Counts (n)	ARIMA	SARIMA	Δ MAE†		ARIMA	SARIMA	Δ RMSE†		ARIMA	SARIMA	Δ MAPE†
Osteonecrosis of jaw	10064658	2452	18.7558	6.53826	12.2175		24.8559	7.50493	17.351		141.787	54.3439	87.443
Paronychia	-	242	6.21083	1.99303	4.2178		8.12765	2.60412	5.52353		-‡	-‡	-‡
Hematocrit decreased	10018838	163	5.72949	2.26145	3.46804		7.84709	2.64541	5.20168		-	-	-
Arthritis	10003246	393	6.84184	3.72902	3.11283		8.29008	4.43506	3.85502		-	-	-
Leukopenia	10024384	3152	8.0139	5.11555	2.89834		8.98475	6.1159	2.86886		74.994	63.1109	11.8831
Appetite loss	-	5790	14.8261	12.7489	2.07718		17.8968	14.9178	2.97902		49.5018	45.5973	3.90453
Guillain-Barre syndrome	10018767	288	3.25047	1.24024	2.01023		3.73226	1.80196	1.93031		-	-	-
Atypical femur fracture	10070884	389	4.19592	2.42339	1.77254		5.34625	3.02739	2.31885		53.8556	73.069	-19.2134
Hypocalcemia	10020947	802	5.3363	4.182	1.1543		6.75963	4.93247	1.82716		291.17	164.359	126.81
Muscle hemorrhage	10028309	175	2.82894	1.73103	1.09791		3.75075	2.07301	1.67774		-	-	-
Secondary adrenal insufficiency	-	197	1.7073	0.811777	0.895524		2.3392	1.24442	1.09478		-	-	-
Lymphoproliferative disorder	10061232	643	3.32009	2.72986	0.590223		4.06425	3.42918	0.635072		60.7025	67.0204	-6.31784
Liver disorder	10024670	7521	8.64529	8.19901	0.446285		10.0788	10.1197	-0.0408954		25.7669	23.0668	2.70008
Diverticulum intestinal hemorrhagic	10013560	454	2.08666	1.72396	0.362699		2.49461	2.15555	0.33906		63.5835	66.8321	-3.24854
Immune-mediated enterocolitis	10078961	192	1.1025	0.760961	0.341542		1.45779	1.05264	0.405155		71.3423	58.5796	12.7627
Influenza	10022000	307	2.42273	2.10831	0.314422		3.5767	3.12302	0.453685		-	-	-
Pain	-	692	2.95278	2.71823	0.234548		3.72299	3.50537	0.217615		119.097	101.218	17.8791
Prostate cancer	10060862	262	1.28998	1.08118	0.208798		1.65206	1.43943	0.212621		72.5564	61.9725	10.5839
Malaise	-	170	0.954247	0.758895	0.195352		1.25511	1.01205	0.24307		45.1862	40.6973	4.48888
Contusion	10050584	194	1.12302	0.94084	0.182183		1.38698	1.19174	0.195244		-	-	-
Gait inability	10017581	119	1.01381	0.84662	0.167186		1.23977	1.05818	0.181594		-	-	-
Fall	10016173	1689	4.21164	4.05599	0.155647		5.40046	5.10798	0.292482		38.328	43.0981	-4.77007
Pemphigoid	10034277	1252	4.14488	4.0035	0.141379		4.8631	4.85674	0.00635483		46.1147	44.1549	1.95979
Mesenteric phlebosclerosis	10074525	103	0.883212	0.748798	0.134414		1.17462	1.00876	0.165864		-	-	-
Aspiration	-	135	0.918777	0.79053	0.128247		1.15886	1.0729	0.0859568		-	-	-
Aspiration pneumonia	-	1301	3.06173	2.93537	0.126361		3.85579	3.86035	-0.00456963		49.9922	64.9706	-14.9784
Oral mucosa erosion	10064594	122	1.00568	0.882791	0.12289		1.2078	1.11717	0.0906265		-	-	-
Cellulitis at injection site	-	282	1.72182	1.61214	0.10968		2.25829	2.1557	0.10259		-	-	-
Urinary tract infection	-	965	2.50345	2.39782	0.105632		3.19556	3.00272	0.19284		43.48	51.7447	-8.26472
Internal hemorrhage	10075192	188	1.11803	1.02203	0.0959989		1.48032	1.30908	0.17124		-	-	-
Lacunar infarction	10051078	238	1.21576	1.13229	0.0834701		1.42742	1.40892	0.0184936		-	-	-
Pneumonia bacterial	10060946	1343	3.42852	3.34832	0.0802035		4.16557	4.1088	0.0567736		46.4513	50.084	-3.63278
Type 1 diabetes mellitus	10067584	409	2.07431	1.99823	0.0760791		2.48672	2.54508	-0.0583655		71.1852	63.7821	7.40302
Diverticulitis	10013538	331	1.73528	1.66036	0.0749173		2.12719	2.05384	0.0733503		-	-	-
Cardiac failure	10007554	4049	6.13425	6.06114	0.0731098		7.4624	7.62978	-0.167383		26.0844	28.0074	-1.92299
Intussusception	10022863	493	1.70047	1.63109	0.0693816		2.40979	2.31891	0.0908874		44.762	57.6254	-12.8634
Eating disorder	-	101	0.896684	0.828695	0.0679882		1.11318	1.04492	0.0682569		-	-	-
Thrombotic cerebral infarction	10067347	119	0.78927	0.722066	0.0672038		1.00385	0.921088	0.0827622		-	-	-
Acute disseminated encephalomyelitis	10000709	243	1.35033	1.29727	0.0530564		1.90419	1.88193	0.0222566		-	-	-
Schizophrenia	10039626	186	0.964283	0.913334	0.0509493		1.17668	1.16591	0.0107657		-	-	-
Transfusion-associated circulatory overload	-	255	0.977313	0.928207	0.0491057		1.29287	1.22674	0.066124		-	-	-
Embolic cerebral infarction	10060839	100	0.687662	0.642024	0.0456376		1.00924	0.981684	0.0275517		-	-	-
Hypophysitis	-	164	0.789797	0.748392	0.0414051		1.15179	1.05428	0.0975037		-	-	-
Feces discoloured	-	140	0.872341	0.83293	0.0394114		1.11461	1.06447	0.0501465		-	-	-
Polymyalgia rheumatica	10036099	102	0.632791	0.600694	0.0320971		0.858882	0.845039	0.0138434		-	-	-
Encephalitis	10014581	264	1.23119	1.20786	0.0233316		1.57218	1.565	0.00717359		51.7697	47.4357	4.334
Portal vein thrombosis	10036206	169	0.851113	0.83724	0.013873		1.07958	1.11595	-0.0363681		-	-	-
Metastases to lung	10027458	104	0.582892	0.569047	0.0138448		0.877185	0.887808	-0.0106234		-	-	-
Neoplasm progression	10061309	281	1.33128	1.32344	0.00784234		1.8415	1.85496	-0.013456		66.8609	70.1973	-3.33638
Rheumatoid arthritis	10039073	290	1.27409	1.26644	0.00764785		1.5283	1.64831	-0.120013		-	-	-
Intestinal ischemia	10022680	112	0.692512	0.686149	0.00636259		0.922724	0.986758	-0.0640336		-	-	-
Post procedural hemorrhage	10051077	442	1.98141	1.97817	0.00324124		2.30714	2.37854	-0.0714014		-	-	-
† The error parameter value of SARIMA was subtracted from that of ARIMA.
‡ Due to the absence of reported cases in certain months, the calculation of MAPE was not feasible.
